# Supplementary material
Source: publisher figshare collection journal article supplement (https://tandf.figshare.com/ndownloader/files/25435639)
Supplement: Supplementary file 1 [file 25435639]

**APPENDICES (ONLINE SUPPLEMENTARY FILES)**

**Appendix S1**

**TABLE S1.1.**: Bioclimatic diagnosis of Antarctic, Subantarctic Insular and neighboring Austroamerican and Neozelandic-Australian localities representative of the bioclimatical analysis

**TABLE S1.2**: Relationships between meteorological stations used in the study and the biogeographic units where they are included

**Appendix S2**

**TABLE S2.1:** Likeness and differential taxa between regions of the Antarctic Kingdom (presence at least in two units). (●): presence, L: lichen, M: moss, P: phanerogam. FK= Falklandian-South Georgian Province; K= Kerguelenian Province; M= Macquarian Province, AC= Aucklandian-Campbellian province; MA= Maritime Antarctica Province; WA= West Antarctica province; EA= East Antarctica Province

**TABLE S2.2**: Differential taxa among provinces of the Antarctic Kingdom (one presence). (●): presence, P: phanerogam. FK= Falklandian-South Georgian Province; K= Kerguelenian Province; M= Macquarian Province, AC= Aucklandian-Campbellian province; MA= Maritime Antarctica Province; WA= West Antarctica province; EA= East Antarctica Province

**TABLE S2.3**: Differential taxa among provinces of the Antarctic Kingdom (one presence). (●): presence, F: Fern. FK= Falklandian-South Georgian Province; K= Kerguelenian Province; M= Macquarian Province, AC= Aucklandian-Campbellian province; MA= Maritime Antarctica Province; WA= West Antarctica province; EA= East Antarctica Province

**TABLE S2.4**: Differential taxa among provinces of the Antarctic Kingdom (one presence). (●): presence, M: musci. FK= Falklandian-South Georgian Province; K= Kerguelenian Province; M= Macquarian Province, AC= Aucklandian-Campbellian province; MA= Maritime Antarctica Province; WA= West Antarctica province; EA= East Antarctica Province

**TABLE S2.5:** Differential taxa among provinces of the Antarctic Kingdom (one presence). (●): presence, L: lichen. FK= Falklandian-South Georgian Province; K= Kerguelenian Province; M= Macquarian Province, AC= Aucklandian-Campbellian province; MA= Maritime Antarctica Province; WA= West Antarctica province; EA= East Antarctica Province

**TABLE S2.6**: Differential taxa among provinces of the Antarctic Kingdom (one presence). (●): presence, H: liveworth. FK= Falklandian-South Georgian Province; K= Kerguelenian Province; M= Macquarian Province, AC= Aucklandian-Campbellian province; MA= Maritime Antarctica Province; WA= West Antarctica province; EA= East Antarctica Province

**Table S2.7:** Differential taxa among provinces of the Antarctic Kingdom (one presence). (●): presence, FU: fungi; FK= Falklandian-South Georgian Province; K= Kerguelenian Province; M= Macquarian Province, AC= Aucklandian-Campbellian province; MA= Maritime Antarctica Province; WA= West Antarctica province; EA= East Antarctica Province

**TABLE S1.1**: Bioclimatic diagnosis of Antarctic, Subantarctic Insular and neighboring Austroamerican and Neozelandic-Australian localities representative of the bioclimatical analysis

|  | **Localities** | **TºC** | **Tp** | **Tps** | **TamaxºC** | **TwmaxºC** | **Ic** | **P** | **Pp** | **Io** | **Tpmax** | **Tpamax** | **TaminºC** | **Σ Timin** | **Bioclimatic diagnosis** |
| --- | --- | --- | --- | --- | --- | --- | --- | --- | --- | --- | --- | --- | --- | --- | --- |
| **1** | Adelaide (Australia) 6m  34º56’S-138º31’E  137 y | 16.9 | 2031 | 666 | 22.0 | 29.9 | 11.8 | 516 | 516 | 2.5 | 2640 | 4476 | 11.9 | 1428 | Mediterranean pluviseasonal-oceanic thermome- diterranean (Ios3=0.96) low dry semihyperoceanic. (Itc=390). |
| **2** | Base Arturo Prat 5m  62º30’S-59º41’W  28+25 y | -2.6 | 33 | 30 | 2.8 | 5.1 | 8.1 | 609 | 251 | 83.5 | 331 | - | -8.3 | -1001 | Polar hyperoceanic upper suprapolar high-snowy subhyperoceanic. |
| **3** | Bellingshausen 16m  62º12’S-58º58’W  43+23 y | -2.3 | 39 | 35 | -0.7 | 2.8 | 8.6 | 974 | 351 | 90.0 | 111 | - | -4.0 | -480 | Polar hyperoceanic upper suprapolar high-snowy subhyperoceanic. |
| **4** | Bernardo O’Higgins 10m  63º18’S-57º54’W  20 y | -3.7 | 14 | 14 | 2.1 | 3.5 | 9.2 | 489 | 101 | 72.0 | 208 | - | -9.7 | -1162 | Polar hyperoceanic upper suprapolar medium-snowy subhyperoceanic. |
| **5** | Bouvet Is. 10m  54º25’S-03º23’E  2+2 y | -0.6 | 70 | 45 | 1.2 | 2.0 | 5.0 | - | - | - | 170 | - | -2.3 | -270 | Polar hyperoceanic lower suprapolar  euhyperoceanic |
| **6** | Byrd 1558m  80º01’S-119º32’W  7 y | -28.3 | 0 | 0 | -23.7 | -11.7 | 22.2 | 124 | 0 | - | 0 | 0 | -32.5 | -3948 | Polar continental lower hypergelid scanty-snowy subcontinental. |
| **7** | Cabo Vírgenes (Argentina) 43m  52º21’S-68º21’W  8y | 6.8 | 811 | 325 | 10.1 | 15.1 | 8.6 | 353 | 353 | 4.4 | 1224 | 2532 | 3.3 | 396 | Temperate hyperoceanic hemiboreal lower subhumid subhyperoceanic. |
| **8** | Campbell Is. (New Zealand) 15m  52º35’S-169º09’E  52y | 7.0 | 840 | 274 | 10.2 | 12.6 | 4.5 | 1382 | 1382 | 14.6 | 1228 | - | 3.7 | 396 | Temperate hyperoceanic subantarctica temperate hemiboreal lower hyperhumid euhyperoceanic. |
| **9** | Casey 42m  66º17’S-110º31’E  54+37 y | -9.2 | 1 | 1 | -6.7 | 1.8 | 14.9 | 270 | 12 | 107.0 | 34 | - | -11.3 | -1356 | Polar oceanic upper suprapolar ultrahyperhu-mid euoceanic. |
| **10** | Chabunco (Chile) 37m  53º00’S-70º52’W  38+21 y | 6.5 | 781 | 317 | 11.1 | 15.0 | 9.2 | 488 | 488 | 6.2 | 1133 | 2406 | 3.6 | 432 | Temperate hyperoceanic hemiboreal lower humid subhyperoceanic. |
| **11** | Davis 13m  68º35’S-77º58’E  50y | -10.0 | 9 | 9 | -8.2 | 3.1 | 18.1 | - | - | - | 70 | - | -12.6 | -1512 | Polar oceanic upper suprapolar scanty-snowy semicontinental. |
| **12** | Deception Is. 8m  62º59’S-60º34’W  9+3 y | -3.3 | 28 | 28 | -1.2 | 2.8 | 10.0 | 564 | 231 | 82.5 | 95 | 784 | -5.5 | -655 | Polar hyperoceanic upper suprapolar medium-snowy subhyperoceanic. |
| **13** | Diego Ramírez Is. (Chile) 10m  56º32’S-68º43’W  14 y | 5.2 | 624 | 213 | 9.7 | 14.7 | 4.3 | 1368 | 1368 | 21.9 | 1164 | - | 2.7 | 356 | Polar hyperocenic subantarctica semipolar infrapolar upper hyperhumid euhyperocea-nic. |
| **14** | Dumont d’Urville 43m  66º40’S-140º00’E  56 y | -10.8 | 0 | 0 | -8.8 | 1.0 | 15.7 | - | - | - | 14 | - | -12.1 | -1452 | Polar oceanic lower hypogelid low-snowy euoceanic. |
|  | **Localities** | **TºC** | **Tp** | **Tps** | **TamaxºC** | **TwmaxºC** | **Ic** | **P** | **Pp** | **Io** | **Tpmax** | **Tpamax** | **TaminºC** | **Σ Timin** | **Bioclimatic classification** |
| **15** | Eight Station 421m  75º14’S-77º10’W  4 y | -26.2 | 0 | 0 | -22.6 | -7.8 | 27.2 | 352 | 0 | - | 0 | 33 | -29.8 | -3463 | Polar continental lower hypergelid medium snowy subcontinental. |
| **16** | El Turbio (Argentina) 223m  51º41’S-72º09’W  10y | 5.7 | 682 | 301 | 10.9 | 16.5 | 10.0 | 412 | 412 | 6.1 | 1308 | 2628 | 0.7 | 84 | Boreal hyperoceanic subantarctica boreal thermoboreal low humid subhyperoceanic |
| **17** | Ellsworth 42m  77º43’S-41º07’W  7y | -23.1 | 0 | 0 | -19.6 | -5.6 | 25.3 | 86 | 0 | 0 | 0 | 6 | -26.7 | -3200 | Polar continental upper hypogelid scanty-snowy subcontinental. |
| **18** | Esperanza 13m  63º24’S-56º59’W  61 y | -5.2 | 12 | 12 | -3.0 | 3.6 | 12.0 | - | - | - | 146 | - | -7.7 | -924 | Polar oceanic hypogelid medium-snowy semihyperoceanic. |
| **19** | Evangelistas Is (Chile) 55m  52º24’S-75º06’W  50+91 y | 6.4 | 768 | 248 | 8.6 | 12.3 | 4.3 | 2650 | 2650 | 34.5 | 1200 | 1704 | 2.6 | 312 | Temperate hyperoceanic subantarctica temperate orotemperate ultrahyperhumid euhyperoceanic. |
| **20** | Falkland Is. (Stanley) (UK) 2m  51º42’S-57º51’W  42+26 y | 5.6 | 671 | 265 | 9.0 | 13.3 | 7.6 | 681 | 681 | 10.1 | 1080 | 2076 | 2.2 | 264 | Boreal hyperocenic subantarctica boreal mesoboreal upper humid euhyperoceanic. |
| **21** | Faraday-Vernadski 11m  65º15’S-64º16’W  61+7 y | -3.7 | 14 | 14 | -1.2 | 2.4 | 9.8 | 460 | 97 | 69.0 | 81 | 744 | -8.1 | -972 | Polar hyperoceanic upper suprapolar medium-snowy subhyperoceanic. |
| **22** | Hallett 5m  72º18’S-170º18’E  8 y | -15.5 | 0 | 0 | -12.8 | 1.1 | 25.3 | 195 | 0 | - | 11 | 167 | -18.2 | -2183 | Polar continental upper hypogelid scanty-snowy subcontinental. |
| **23** | Halley 30m  75º35’S-26º30’W  55 y | -18.7 | 0 | 0 | -16.3 | -2.5 | 24.2 | - | - | - | 0 | - | -21.2 | -2544 | Polar continental upper hypogelid low-snowy subcontinental. |
| **24** | Hobbart (Tasm. Aust.) 4m  42º50’S-147º29’E  111 y | 12.5 | 1504 | 490 | 16.6 | 21.3 | 8.9 | 594 | 594 | 4.0 | 1992 | 3744 | 8.4 | 1008 | Temperate hyperoceanic mesotemperate low subhumid subhyperoceanic. (Itc=282). |
| **25** | Lago Argentino (Argentina) 223m  50º20’S-72º16W  13+11y | 7.4 | 888 | 384 | 12.9 | 19.4 | 12.0 | 194 | 194 | 2.4 | 1548 | 2701 | 2.3 | 276 | Mediterranean pluviseanonal-oceanic low oromediterranean low dry semihyperoceanic (Ios3=0.8) |
| **26** | Little America (destroyed) 42m  78º11’S-162º12’W  5 y | -23.1 | 0 | 0 | -19.1 | -2.8 | 31.4 | 264 | 0 | - | 0 | 95 | -27.2 | -3262 | Polar continental upper hypogelid low-snowy eucontinental. |
| **27** | Macquarie Is. (Australia) 6m  54º29’S-158º57’E  4+3 y | 4.8 | 576 | 200 | 7.6 | 10.6 | 3.7 | 930 | 930 | 16.2 | 912 | - | 2.0 | 240 | Polar hyperocenic subantarctica semipolar upper infrapolar lower hyperhumid ultrahy-peroceanic. |
| **28** | Marambio 10m  64º15’S-56º39’W  35 y | -8.5 | 0 | 0 | -6.4 | 1.5 | 13.9 | - | - | - | 36 | - | -10.9 | -1308 | Polar oceanic upper suprapolar medium-snowy semihyperoceanic. |

|  | **Localities** | **TºC** | **Tp** | **Tps** | **TamaxºC** | **TwmaxºC** | **Ic** | **P** | **Pp** | **Io** | **Tpmax** | **Tpamax** | **TminºC** | **Σ Timin** | **Bioclimatic classification** |
| --- | --- | --- | --- | --- | --- | --- | --- | --- | --- | --- | --- | --- | --- | --- | --- |
| **29** | Marion Is.(Price Edward Is.) 10m  46º54’S-37º44’E  30y | 5.5 | 658 | 212 | 8.5 | 10.9 | 4.0 | 1360 | 1360 | 20.6 | 1020 | - | 3.1 | 372 | Polar hyperocenic subantarctica semipolar infrapolar upper hyperhumid ultrahyperocea-nic |
| **30** | Mawson 16m  67º35’S-62º52’E  57 y | -11.2 | 0 | 0 | -9.6 | 2.5 | 18.6 | - | - | - | 45 | - | -13.4 | -1608 | Polar oceanic lower hypogelid low-snowy semicontinental. |
| **31** | Mc Murdo 24m  77º53’S-166º48’E  83-23 y | -17.2 | 0 | 0 | -13.2 | -0.1 | 24.2 | 106 | 0 | - | 0 | 91 | -20.7 | -2484 | Polar continental upper hypogelid scanty-snowy subcontinental. |
| **32** | Melbourne (Australia) 35m  37º49’S-144º58’E  127 y | 14.8 | 1781 | 583 | 19.1 | 26.1 | 10.5 | 656 | 656 | 3.7 | 2292 | 4152 | 10.5 | 1260 | Temperate hyperoceanic thermotemperate low subhumid subhyperoceanic. (Itc=339). |
| **33** | Melchior 8m  64º18’S-63º00’W  11y | -3.5 | 19 | 19 | -1.4 | 3.8 | 10.2 | 1107 | 197 | 104.8 | 20 | - | -10.1 | -1214 | Polar hyperoceanic upper suprapolar super-snowy subhyperoceanic. |
| **34** | Mirny 30m  66º37’S-93º01’E  56+5 y | -11.2 | 0 | 0 | -9.4 | 0.0 | 15.2 | 626 | 0 | - | 0 | 250 | -12.8 | -1536 | Polar oceanic lower hypogelid high-snowy euoceanic. |
| **35** | Mount Barrow (Tasm. Aust.) 1323m  41º24’S-147º25’E  14 y | 4.6 | 553 | 273 | 7.8 | 14.5 | 10.6 | 1445 | 1445 | 26.1 | 936 | - | 1.5 | 178 | Temperate hyperoceanic orotemperate (Tp=553) low ultrahyperhumid subhyperoceanic. |
| **36** | Navarino (Chile) 8m  55º10’S-67º30’W  14+22 y | 5.9 | 709 | 287 | 8.9 | 12.4 | 8.0 | 449 | 449 | 6.3 | 1068 | - | 2.7 | 324 | Boreal hyperoceanic subantarctica boreal thermoboreal lower humid subhyperoceanic. |
| **37** | Neumayer 50m  70º39’S-08º15’W  30 y | -16.0 | 0 | 0 | -14.3 | -2.2 | 20.7 | - | - | - | 0 | - | -17.8 | -2136 | Polar oceanic upper hypogelid semi-continental. |
| **38** | Novorevskaya 119m  70º46’S-11º50’E  50+25 y | -10.3 | 0 | 0 | -8.8 | 1.4 | 17.5 | 108 | 0 | - | 29 | - | -11.4 | -1368 | Polar oceanic lower hypogelid low-snowy semicontinental. |
| **39** | Oásis 28m  66º18’S-100º43’E  3+4 y | -9.1 | 10 | 10 | -5.6 | 3.9 | 17.8 | 216 | 13 | 13.0 | 89 | 516 | -12.6 | -1506 | Polar oceanic upper suprapolar extreme hyperhumid semicontinental. |
| **40** | Orkney Is. 6m  60º45’S-44º43’W  106+90 y | -3.9 | 14 | 14 | -1.5 | 2.8 | 11.0 | 486 | 88 | 62.7 | 122 | - | -7.1 | -852 | Polar hyperoceanic upper suprapolar medium-snowy subhyperoceanic. |
| **41** | Pionerskaya 2700m  69º44’S-95º30’E.  3+4 y | -38.8 | 0 | 0 | -35.6 | -19.4 | 25.6 | 966 | 0 | - | 0 | 0 | -42.0 | -5039 | Polar continental upper hypergelid high-snowy subcontinental. |
| **42** | Port-aux-Français (K. Is. FR) 10m  49º21’S-70º13’E  42 y | 4.9 | 588 | 228 | 7.8 | 11.5 | 6.1 | 730 | 730 | 12.4 | 936 | - | 1.9 | 228 | Polar hyperocenic subantarctica semipolar infrapolar lower hyperhumid euhyperoceanic. |

|  | **Localities** | **TºC** | **Tp** | **Tps** | **TamaxºC** | **TwmaxºC** | **Ic** | **P** | **Pp** | **Io** | **Tpmax** | **Tpamax** | **TminºC** | **Σ Timin** | **Bioclimatic classification** |
| --- | --- | --- | --- | --- | --- | --- | --- | --- | --- | --- | --- | --- | --- | --- | --- |
| **43** | Punta Arenas (Chile) 8m  53º10’S-70º54’W  41+50 y | 6.7 | 805 | 325 | 9.8 | 14.4 | 9.2 | 447 | 447 | 5.6 | 1177 | 2436 | 2.5 | 408 | Temperate hyperoceanic hemiboreal upper subhumid subhyperoceanic. |
| **44** | Queenstown (New Zealand) 356m  45º01’S-168º44’E  33 y | 10.1 | 1212 | 459 | 15.2 | 21.7 | 11.9 | 813 | 813 | 6.7 | 1824 | 3001 | 5.0 | 601 | Temperate oceanic supratemperate low humid semihyperoceanic. (Itc=173). |
| **45** | Rio Douglas (Chile) 5m  55º10’S-68º07’W  4+4 y | 5.5 | 660 | 273 | 9.2 | 13.7 | 8.6 | 931 | 931 | 14.1 | 1104 | - | 1.5 | 180 | Boreal hyperoceanic subantarctica boreal mesoboreal low hyperhumid ubhyperocea-nic. |
| **46** | Rio Gallegos (Argentina) 20m  51º37’S-69º17’W  63 y | 7.2 | 864 | 376 | 12.3 | 19.1 | 12.0 | 246 | 246 | 2.8 | 1476 | 2784 | 2.3 | 276 | Temperate oceanic hemiboreal upper dry semihyperoceanic. |
| **47** | Rio Grande (Argentina) 9m  53º48’S-67º45’W  19 y | 5.7 | 684 | 301 | 9.7 | 14.2 | 10.5 | 327 | 327 | 4.8 | 1164 | 2040 | 1.6 | 192 | Boreal hyperoceanic subantarctica boreal thermoboreal lower subhumid. subhyper-oceanic. |
| **48** | Rothera 32m  67º34’S-68º08’W  33 y | -4.4 | 24 | 24 | -1.8 | 2.7 | 12.1 | - | - | - | 78 | - | -8.6 | -1032 | Polar oceanic upper suprapolar semihyper-oceanic. |
| **49** | Scott Base 16m  77º51’S-166º46’E  53 y | -19.8 | 0 | 0 | -17.7 | -1.6 | 25.5 | - | 0 | - | 0 | - | -22.2 | -2664 | Polar continental upper hypogelid scanty-snowy subcontinental. |
| **50** | South Georgia Is. Grytviken(UK) 4m  54º17’S-36º30’W  50 y | 1.6 | 263 | 143 | 5.1 | 9.1 | 7 3 | 1394 | 824 | 31.3 | 610 | 2388 | -1.6 | -192 | Boreal hyperocenic subantarctica boreal lower cryoroboreal ultrahyperhumid euhyperoceanic. |
| **51** | South Pole 2835m  90º00’S-00  38+38 y | -49.4 | 0 | 0 | -46.3 | -26.2 | 32.0 | 3 | 0 | - | 0 | 0 | -56.9 | -6828 | Polar continental lower ultragelid un-snowy eucontinental. |
| **52** | Sovetskaya 3540m  74º05’S-97º29’E  2+4 y | -53.0 | 0 | 0 | -48.0 | -27.2 | 33.9 | 48 | 0 | - | 0 | 0 | -58.0 | -6955 | Polar continental lower ultragelid un-snowy eucontinental. |
| **53** | Stonington 9m  68º11’S-67º01’W  4 y | -7.4 | 0 | 0 | -3.9 | 2.8 | 13.9 | 318 | 0 | - | 61 | - | -10.9 | -1312 | Polar oceanic lower hypogelid low-snowy semihyperoceanic. |
| **54** | Syowa 21m  69º00’S-39º33’E  47 y | -10.5 | 0 | 0 | -8.3 | 0.9 | 18.4 | - | - | - | 11 | - | -12.2 | -1464 | Polar oceanic lower hypogelid low-snowy semicontinental. |
| **55** | Ushuaia (Argentina) 7m  54º49’S-68º18’W  50y | 5.3 | 638 | 273 | 9.6 | 14.3 | 8.6 | 547 | 547 | 8.6 | 1152 | 2712 | 1.7 | 204 | Boreal hyperoceanic subantarctica boreal mesoboreal lower humid subhyperoceanic. |
| **56** | Vostok 3490m  78º27’S-106º52’E  28+26 y | -54.9 | 0 | 0 | -51.0 | -28.2 | 36.3 | 21 | 0 | - | 0 | 0 | -59 4 | -7128 | Polar continental upper ultragelid un-snowy eucontinental. |

|  | **Localities** | **TºC** | **Tp** | **Tps** | **TamaxºC** | **TwmaxºC** | **Ic** | **P** | **Pp** | **Io** | **Tpmax** | **Tpamax** | **TaminºC** | **Σ Timin** | **Bioclimatic classification** |
| --- | --- | --- | --- | --- | --- | --- | --- | --- | --- | --- | --- | --- | --- | --- | --- |
| **57** | Wilkes 9m  66º16’S-110º31’E  8 y | -9.6 | 0 | 0 | -7.2 | 1.1 | 15.8 | 309 | 0 | - | 17 | 328 | -12.1 | -1450 | Polar oceanic lower hypogelid low-snowy euoceanic. |

**TABLE S1.2**: Relationships between meteorological stations used in the study and the biogeographic units where they are included

| **Kingdom** | **Subkingdom** | **Region** | **Province** | **Meteorological stations (Nº)**  **stations (Nº)** |
| --- | --- | --- | --- | --- |
| Neotropical-Austroamerican | Austroamerican | Middle Chilean-Patagonian Mediterranean | South Patagonian | 25 |
| Valdivian-Magellanian | Magellanian Temperate | 7,10,43,46 |
| Austromagellanian Boreal | 16,19,36,45,47,55 |
| Antarctic |  | Antarctica | Maritime Antarctica | 2,3,4,5,13,18,21,33,40,48 |
| West Antarctica | 6,15,17,22,23,26,28,31,37  49, 53 |
| East Antarctica | 9,11,14,30,34,38,39,41  51,52,54,56,57 |
| Subantarctic Insular | Falklandian-South Georgian | 13,20,50 |
| Kerguelenian | 29, 42 |
| Macquarian | 37 |
| Aucklandian-Campbellian | 8 |
| Neozealandic-Australian | Neozealandic | Neozealandic | Southern Neozealandic | 44 |
| Australian | Australian Temperate | Victorian | 32 |
| Tasmanian | 24,35 |
| Australian Mediterranean | Adelaidan | 1 |

**TABLE S2.1:** Likeness and differential taxa between regions of the Antarctic Kingdom (presence at least in two units). (●): presence, L: lichen, M: moss, P: phanerogam. FK= Falklandian-South Georgian Province; K= Kerguelenian Province; M= Macquarian Province, AC= Aucklandian-Campbellian province; MA= Maritime Antarctica Province; WA= West Antarctica province; EA= East Antarctica Province

| **ANTARCTIC KINGDOM** | | | | | | | | |
| --- | --- | --- | --- | --- | --- | --- | --- | --- |
| **REGIONS** | | **SUBANTARCTIC I.** | | | | **ANTARCTICA** | | |
| **Taxon** | **Class** | **FK** | **KG** | **MQ** | **AC** | **MA** | **WA** | **EA** |
| *Juncus scheuchzerioides*Gaudich. | P | **●** | **●** | **●** | **●** | **-** | **-** | **-** |
| *Festuca contracta*Kirk | P | **●** | **●** | **●** | **-** | **-** | **-** | **-** |
| *Syntrichia anderssonii* (Aongstr.) Zand. | M | **●** | **●** | **●** | **-** | **-** | **-** | **-** |
| *Carex trifida*Cav. | P | **●** | **-** | **●** | **●** | **-** | **-** | **-** |
| *Andreaea nitida* Hook.f. & Wils. | M | **●** | **-** | **●** | **●** | **-** | **-** | **-** |
| *Tortula arenae* (Besch.) Broth | M | **●** | **●** | **-** | **-** | **-** | **-** | **-** |
| *Cladia aggregate* (Sw.) Nyl. | L | **●** | **-** | **●** |  |  |  |  |
| *Cladonia scabriuscula* (Del.) Nyl. | L | **●** | **-** | **●** |  |  |  |  |
| *Breutelia elongata* (Hook.f. & Wils.) Mitt. | M | **-** | **-** | **●** | **●** | **-** | **-** | **-** |
| *Breutelia pendula* (Sm.) Mitt. | M | **-** | **-** | **●** | **●** | **-** | **-** | **-** |
| *Stilbocarpa polaris* (Hombr.) A.Gray | P | **-** | **-** | **●** | **●** | **-** | **-** | **-** |
| *Rhacocarpus purpurascens* (Bird.) Par. | M | **-** | **-** | **●** | **●** | **-** | **-** | **-** |
| *Thuidiopsis furfurosa* (Hook.f. & Wils.) Fleisch. | M | **-** | **-** | **●** | **●** | **-** | **-** | **-** |
| *Bryum urbanskyi* Broth. | M | **-** | **-** | **-** | **-** | **●** | **●** | **●** |
| *Coscinodon reflexidens* Mull.Hal. | M | **-** | **-** | **-** | **-** | **●** | **●** | **●** |
| *Orthogrimmia sessitana* (De Not.) Och. & Zarn. | M | **-** | **-** | **-** | **-** | **●** | **●** | **●** |
| *Syntrichia sarconeurum* Ochyra & RH.Zander | M | **-** | **-** | **-** | **-** | **●** | **●** | **●** |
| *Buellia cladocarpiza* M.Lamb. | L | **-** | **-** | **-** | **-** | **●** | **●** | **●** |
| *Buellia frigida* Darb. | L | **-** | **-** | **-** | **-** | **●** | **●** | **●** |
| *Caloplaca darbishirei* (Dodge & Baker) Cret. | L | **-** | **-** | **-** | **-** | **●** | **●** | **●** |
| *Lecanora expectans* Darb. | L | **-** | **-** | **-** | **-** | **●** | **●** | **●** |
| *Lecidea cancriformis* Dodge & Baker | L | **-** | **-** | **-** | **-** | **●** | **●** | **●** |
| *Lepraria alpina* (de Lessd.) Tret. & Baruffo) | L | **-** | **-** | **-** | **-** | **●** | **●** | **●** |
| *Rinodina egentissima* (Hue) Darb. | L | **-** | **-** | **-** | **-** | **●** | **●** | **●** |
| *Sterocaulon antarcticum* Vain. | L | **-** | **-** | **-** | **-** | **●** | **●** | **●** |
| *Umbilicaria aprina* Nyl. | L | **-** | **-** | **-** | **-** | **●** | **●** | **●** |
| *Umbilicaria decussata* (Vill.) Zahlbr. | L | **-** | **-** | **-** | **-** | **●** | **●** | **●** |
| *Usnea sphacelata* R.Br. | L | **-** | **-** | **-** | **-** | **●** | **●** | **●** |
| *Xanthoria candelaria* f. *antarctica* (L.) Th.Fr. | L | **-** | **-** | **-** | **-** | **●** | **●** | **●** |
| *Lecania brialmontii* (Vain.) Zahlbr. | L | **-** | **-** | **-** | **-** | **●** | **●** | **-** |
| *Caloplaca regalis* (Vain.) Zahlbr. | L | - | - | - | - | ● | ● | - |
| *Dematocarpon polyphyllizum* (Nyl.) B. & For. | L | **-** | **-** | **-** | **-** | **●** | **●** | **-** |
| *Hypnum revolutum* (Mitt.) Lindb. | M | **-** | **-** | **-** | **-** | **●** | **●** | **-** |
| *Bryum pallescens* Schleich. *ex* Schwaegr. | M | **-** | **-** | **-** | **-** | **●** | **-** | **●** |
| *Leproloma cacuminum* (Massal.) Laundon | L | **-** | **-** | **-** | **-** | **●** | **-** | **●** |
| *Buellia nelsonii* Darb. | L | **-** | **-** | **-** | **-** | **●** | **-** | **●** |
| *Buellia grisea* Dodge & Baker | L | **-** | **-** | **-** | **-** | **-** | **●** | **●** |
| *Buellia muscicola* Dodge & Baker | L | **-** | **-** | **-** | **-** | **-** | **●** | **●** |
| *Buellia pallida* Dodge & Baker | L | **-** | **-** | **-** | **-** | **-** | **●** | **●** |
| *Buellia pycnogonoides* Darb. | L | **-** | **-** | **-** | **-** | **-** | **●** | **●** |
| *Caloplaca saxicola* (Hoffm.) Nordin | L | **-** | **-** | **-** | **-** | **-** | **●** | **●** |

| *Rinodina sordida* Dodge & Baker | L | **-** | **-** | **-** | **-** | **-** | **●** | **●** |
| --- | --- | --- | --- | --- | --- | --- | --- | --- |
| *Pohlia nutans* (Hedw.) Lindb. | M | **●** | **●** | **-** | **●** | **●** | **●** | **●** |
| *Ceratodon purpureus* (Hedw.) Brid. | M | **●** | **-** | **●** | **●** | **●** | **●** | **●** |
| *Bryum argenteum* Hedw. | M | **●** | **●** | **●** | **-** | **●** | **●** | **●** |
| *Bryoerythrophyllum recurvirostrum* (Hedw.) Ch. | M | **●** | **●** | **●** | **-** | **●** | **●** | **●** |
| *Syntrichia magellanica* (Mont.) R.H.Zander | M | **●** | **●** | **-** | **-** | **●** | **●** | **●** |
| *Polytrichum piliferum* Hedw. | M | **●** | **●** | **-** | **-** | **●** | **●** | **-** |
| *Sanionia uncinata* (Hedw.) Loesk. | M | **●** | **●** | **●** | **-** | **●** | **●** | **-** |
| *Polytrichastrum alpinum* (Hedw.) G.L.Smith | M | **●** | **●** | **●** | **●** | **●** | **-** | **-** |
| *Pohlia cruda* (Hedw.) Lindb. | M | **●** | **●** | **-** | **-** | **●** | **●** | **.** |
| *Deschampsia antarctica* É.Desv. | P | **●** | **●** | **-** | **-** | **●** | **-** | **-** |

**TABLE S2.2:** Differential taxa among provinces of the Antarctic Kingdom (one presence). (●): presence, P: phanerogam. FK= Falklandian-South Georgian Province; K= Kerguelenian Province; M= Macquarian Province, AC= Aucklandian-Campbellian province; MA= Maritime Antarctica Province; WA= West Antarctica province; EA= East Antarctica Province

| **BIOGEOGRAPHIC REGIONS** | | **SUBANTARCTIC I. INSULAR INSULAR INSULAR** | | | | **ANTARCTICA** | | |
| --- | --- | --- | --- | --- | --- | --- | --- | --- |
| **Taxon** | **class** | **FK** | **K** | **M** | **AC** | **MA** | **WA** | **EA** |
| *Colobanthus subulatus*Hook.f. | P | **●** | **-** | **-** | **-** | **-** | **-** | **-** |
| *Empetrum rubrum* Vahl *ex* Willd. | P | **●** | **-** | **-** | **-** | **-** | **-** | **-** |
| *Pratia repens* Gaudich. | P | **●** | **-** | **-** | **-** | **-** | **-** | **-** |
| *Rostkovia magellanica* Hook.f. | P | **●** | **-** | **-** | **-** | **-** | **-** | **-** |
| *Tetroncium magellanicum* Willd. | P | **●** | **-** | **-** | **-** | **-** | **-** | **-** |
| *Juncus scheuchzerioides* Gaudich. | P | **-** | **●** | **-** | **-** | **-** | **-** | **-** |
| *Poa kerguelensis* Steud. | P | **-** | **●** | **-** | **-** | **-** | **-** | **-** |
| *Galium antarcticum* Hook.f. | P | **-** | **●** | **-** | **-** | **-** | **-** | **-** |
| *Pringlea antiscorbutica* R.Br. ex Hook.f. | P | **-** | **●** | **-** | **-** | **-** | **-** | **-** |
| *Ranunculus pseudotrullifolius* Skottsb. | P | **-** | **●** | **-** | **-** | **-** | **-** | **-** |
| *Uncinia brevicaulis* Thouars | P | **-** | **●** | **-** | **-** | **-** | **-** | **-** |
| *Coriandrum sativum* L. | P | **-** | **●** | **-** | **-** | **-** | **-** | **-** |
| *Limosella australis* R.Br*.* | P | **-** | **●** | **-** | **-** | **-** | **-** | **-** |
| *Lyallia kerguelensis* Hook.f. | P | **-** | **●** | **-** | **-** | **-** | **-** | **-** |
| *Cardamine corymbosa* Hook.f. | P | **-** | **-** | **●** | **-** | **-** | **-** | **-** |
| *Epilobium linnaeoides* Hook.f. | P | **-** | **-** | **●** | **-** | **-** | **-** | **-** |
| *Epilobium nerterioides* A.Cunn. | P | **-** | **-** | **●** | **-** | **-** | **-** | **-** |
| *Poa hamiltonii* Kirk | P | **-** | **-** | **●** | **-** | **-** | **-** | **-** |
| *Puccinellia macquariensis* (Cheeseman) Allan & Jansen | P | **-** | **-** | **●** | **-** | **-** | **-** | **-** |
| *Chionochloa antarctica* (Hook.f.) Zotov. | P | **-** | **-** | **-** | **●** | **-** | **-** | **-** |
| *Colobanthus hookeri* Cheeseman | P | **-** | **-** | **-** | **●** | **-** | **-** | **-** |
| *Coprosma cuneata* Hook.f. | P | **-** | **-** | **-** | **●** | **-** | **-** | **-** |
| *Hebe elliptica* (G.Forst.) Pennell | P | **-** | **-** | **-** | **●** | **-** | **-** | **-** |
| *Leptinella lanata* Hook.f. | P | **-** | **-** | **-** | **●** | **-** | **-** | **-** |
| *Pleurophyllum criniferum* Hook.f. | P | **-** | **-** | **-** | **●** | **-** | **-** | **-** |
| *Poa litorosa* Cheeseman | P | **-** | **-** | **-** | **●** | **-** | **-** | **-** |
| *Poa ramosissima* Hook.f. | P | **-** | **-** | **-** | **●** | **-** | **-** | **-** |
| *Ranunculus pinguis* Hook.f. | P | **-** | **-** | **-** | **●** | **-** | **-** | **-** |
| *Colobanthus quitensis* (Kunth) Bartl. | P | **-** | **-** | **-** | **-** | **●** | **-** | **-** |
|  | | | | | | | | |

| **TABLE S2.3:** Differential taxa among provinces of the Antarctic Kingdom (one presence). (●): presence, F: Fern. FK= Falklandian-South Georgian Province; K= Kerguelenian Province; M= Macquarian Province, AC= Aucklandian-Campbellian province; MA= Maritime Antarctica Province; WA= West Antarctica province; EA= East Antarctica Province | | | | | | | | |  |
| --- | --- | --- | --- | --- | --- | --- | --- | --- | --- |
| **BIOGEOGRAPHIC REGIONS** | | **SUBANTARCTIC I.** | | | | **ANTARCTICA** | | | |
| **Taxon** | **class** | **FK** | **K** | **M** | **AC** | **MA** | **WA** | **EA** | |
| *Hymenophyllum falklandicum* Baker | F | **●** | **-** | **-** | **-** | **-** | **-** | **-** | |
| *Polystichum mohrioides* (Bory) C.Presl | F | **●** | **-** | **-** | **-** | **-** | **-** | **-** | |
| *Grammitis poeppigiana* (Mett.) Pic.Serm. | F | **-** | **●** | **-** | **-** | **-** | **-** | **-** | |
| *Asplenium affine* Sw. | F | **-** | **●** | **-** | **-** | **-** | **-** | **-** | |
| *Blechnum australe* L. | F | **-** | **●** | **-** | **-** | **-** | **-** | **-** | |
| *Elaphoglossum succisifolium* (Thouars) T.Moore | F | **-** | **●** | **-** | **-** | **-** | **-** | **-** | |
| *Gleichenia polypodioides* (L.) Sm. | F | **-** | **●** | **●** | **-** | **-** | **-** | **-** | |
| *Ophioglossum crotalophoroides* Walter | F | **-** | **-** | **●** | **-** | **-** | **-** | **-** | |
| *Polystichum cystostegium* (Hook.) J.B.Armstr. | F | **-** | **-** | **-** | **●** | **-** | **-** | **-** | |

**TABLE S2.4**: Differential taxa among provinces of the Antarctic Kingdom (one presence). (●): presence, M: musci. FK= Falklandian-South Georgian Province; K= Kerguelenian Province; M= Macquarian Province, AC= Aucklandian-Campbellian province; MA= Maritime Antarctica Province; WA= West Antarctica province; EA= East Antarctica Province

| **BIOGEOGRAPHIC REGIONS** | | **SUBANTARCTIC I.** | | | | **ANTARCTICA** | | |
| --- | --- | --- | --- | --- | --- | --- | --- | --- |
| **Taxon** | **class** | **FK** | **K** | **M** | **AC** | **MA** | **WA** | **EA** |
| *Andreaea flabellata* C. Muell. | M | **●** | **-** | **-** | **-** | **-** | **-** | **-** |
| *Bucklandiella membranacea* (Mitt.) Bednarek & al. | M | **●** | **-** | **-** | **-** | **-** | **-** | **-** |
| *Dendroligotrichum squamosum* (Hook.f. & Wi.) Card. | M | **●** | **-** | **-** | **-** | **-** | **-** | **-** |
| *Dicranoloma subimponens* (Card.) Broth. | M | **●** | **-** | **-** | **-** | **-** | **-** | **-** |
| *Orthodontium lineare* Schwaegr. | M | **●** | **-** | **-** | **-** | **-** | **-** | **-** |
| *Philonotis vagans* (Hook. f. & Wils.) Mitt | M | **●** | **-** | **-** | **-** | **-** | **-** | **-** |
| *Plagiothecium falklandicum* (Card. & Broth.) Newton | M | **●** | **-** | **-** | **-** | **-** | **-** | **-** |
| *Racomitrium ptychophyllum* (Mitt.) Mitt. | M | **●** | **-** | **-** | **-** | **-** | **-** | **-** |
| *Sphagnum fimbriatum* Wils. | M | **●** | **-** | **-** | **-** | **-** | **-** | **-** |
| *Tortula fontana* (C. Muell.) Broth. | M | **●** | **-** | **-** | **-** | **-** | **-** | **-** |
| *Warnstorfia exannulata* (Schimp.) Loeske | M | **●** | **-** | **-** | **-** | **-** | **-** | **-** |
| *Syntrichia anderssonii* (Aongstr.) Zand. | M | **-** | **●** | **-** | **-** | **-** | **-** | **-** |
| *Vittia pachyloma* (Mont.) Ochyra | M | **-** | **●** | **-** | **-** | **-** | **-** | **-** |
| *Andreaea paralella* C. Muelle. | M | **-** | **●** | **-** | **-** | **-** | **-** | **-** |
| *Brachythecium salebrosum* ([Web.](https://species.wikimedia.org/wiki/F.Weber) & [Mohr](https://species.wikimedia.org/wiki/D.Mohr)) [Schimp.](https://species.wikimedia.org/wiki/Schimp.) | M | **-** | **●** | **-** | **-** | **-** | **-** | **-** |
| *Bucklandiella plychophylla* (Mitt.) Bednar. & Ochyr. | M | **-** | **●** | **-** | **-** | **-** | **-** | **-** |
| *Bucklandiella rupestris* (Hook.f. & Wils.) Bern.  Ochy. | M | **-** | **●** | **-** | **-** | **-** | **-** | **-** |
| *Syntrichia geheebiopsis* (Muell.Hal.) Zand. | M | **-** | **●** | **-** | **-** | **-** | **-** | **-** |
| *Anomobryum julaceum* (P.Gaernt. & Schimp.) | M | **-** | **●** | **-** | **-** | **-** | **-** | **-** |
| *Brachythecium austrorivulare* Broth. | M | **-** | **●** | **-** | **-** | **-** | **-** | **-** |
| *Dicranoloma robustum f. othophyllum* (Ho. & W.) Par | M | **-** | **●** | **-** | **-** | **-** | **-** | **-** |
| *Didymodon australasiae* (Hook. & Grav.) Zand. | M | **-** | **●** | **-** | **-** | **-** | **-** | **-** |
| *Drepranocladus sendineri* (Schimp.) Warnst. | M | **-** | **●** | **-** | **-** | **-** | **-** | **-** |
| *Grimmia kidder* Jarne. | M | **-** | **●** | **-** | **-** | **-** | **-** | **-** |
| *Grimmia pulvinatula* C.Muell. | M | **-** | **●** | **-** | **-** | **-** | **-** | **-** |
| *Hennediella marginata* (Hook.f.&Wils) Zander | M | **-** | **●** | **-** | **-** | **-** | **-** | **-** |
| *Hypnum longicaule* var. *microruncinatum* Mitt. | M | **-** | **●** | **-** | **-** | **-** | **-** | **-** |
| *Muelleriella engelii* Vott. | M | **-** | **●** | **-** | **-** | **-** | **-** | **-** |
| *Physcomitrium laxum* (Ahook.f. & Wils.) C.Muell. | M | **-** | **●** | **-** | **-** | **-** | **-** | **-** |
| *Pohlia elongate* Hedw. | M | **-** | **●** | **-** | **-** | **-** | **-** | **-** |
| *Pohlia nutans f. bicolor* (Hedw.) Lindt | M | **-** | **●** | **-** | **-** | **-** | **-** | **-** |
| *Sanionia orthothecioides* (Lindb.) Loeske | M | **-** | **●** | **-** | **-** | **-** | **-** | **-** |
| *Achrophyllum dentatum* (Hook.f. & Wils.) Vitt. & Cr. | M | **-** | **-** | **●** | **-** | **-** | **-** | **-** |
| *Acrocladium chlamydophyllum* Hook.f. & Wils. | M | **-** | **-** | **●** | **-** | **-** | **-** | **-** |
| *Amblystegium serpens* (Hedw.) B.S.G. | M | **-** | **-** | **●** | **-** | **-** | **-** | **-** |
| *Lembophyllum divulsum* (Hook.f. & Wils.) Lindb. | M | **-** | **-** | **●** | **-** | **-** | **-** | **-** |
| *Psilopilum austral* (Hook.f.& Wils.) Mitt. | M | **-** | **-** | **●** | **-** | **-** | **-** | **-** |
| *Rhacocarpus patagonicus* Broth. | M | **-** | **-** | **●** | **-** | **-** | **-** | **-** |
| *Rhizogonium mnioides* (Hedw.) Will. | M | **-** | **-** | **●** | **-** | **-** | **-** | **-** |
| *Tortula phaea* (Hook.f. & Wils.) Dix. | M | **-** | **-** | **●** | **-** | **-** | **-** | **-** |
| *Tortula rubra* Mitt. | M | **-** | **-** | **●** | **-** | **-** | **-** | **-** |
| *Zygodon menziesii* (Schwaegr.) Arnott | M | **-** | **-** | **●** | **-** | **-** | **-** | **-** |

| *Dicranoloma robustum* Roiv | M | **-** | **-** | **-** | **●** | **-** | **-** | **-** |
| --- | --- | --- | --- | --- | --- | --- | --- | --- |
| *Bryum blandum* Hook.f. & Wils. | M | **-** | **-** | **-** | **●** | **-** | **-** | **-** |
| *Fallaciella gracilis* (Hook.f. & Wils.) Crum | M | **-** | **-** | **-** | **●** | **-** | **-** | **-** |
| *Campylopus pallidus* Hook.f. & Wils | M | **-** | **-** | **-** | **●** | **-** | **-** | **-** |
| *Distichophyllum pulchellum* (Hampe) Mitt. | M | **-** | **-** | **-** | **●** | **-** | **-** | **-** |
| *Hypopterygium novae-seelandiae* Müll.Hal. | M | **-** | **-** | **-** | **●** | **-** | **-** | **-** |
| *Weymouthia cochlearifolia* (Schwägr.) Dix. | M | **-** | **-** | **-** | **●** | **-** | **-** | **-** |
| *Brachythecium austroglareosum* (C. Muell.) Kindb. | M | **-** | **-** | **-** | **-** | **●** | **-** | **-** |
| *Warnstorfia fontinaliopsis* (Muell. Hal.) Ochyra | M | **-** | **-** | **-** | **-** | **●** | **-** | **-** |
| *Ditrichum hyalinocuspidatum* Card. | M | **-** | **-** | **-** | **-** | **●** | **-** | **-** |
| *Hymenoloma crispulum* (Hedw.) Ochyra | M | **-** | **-** | **-** | **-** | **●** | **-** | **-** |
| *Schistidium rivulare* (Brid.) Podp. | M | **-** | **-** | **-** | **-** | **●** | **-** | **-** |
| *Cratoneuropsis relaxa* (Hook.f. & Wils.) Fleisch. | M | **-** | **-** | **-** | **-** | **●** | **-** | **-** |
| *Chorisodontium aciphyllum* (Hook.f. & Wils.) Broth. | M | **-** | **-** | **-** | **-** | **●** | **-** | **-** |
| *Ditrichum hyalinum* (Mitt.) Kuntze | M | **-** | **-** | **-** | **-** | **●** | **-** | **-** |
| *Brachythecium glaciale* B.S.G. | M | **-** | **-** | **-** | **-** | **●** | **-** | **-** |
| *Bryum orbiculatifolium* Card. & Broth. | M | **-** | **-** | **-** | **-** | **●** | **-** | **-** |
| *Pohlia drummondii* (C. Muell.) A.L.Andrews | M | **-** | **-** | **-** | **-** | **●** | **-** | **-** |
| *Campylium polygamum* (B.S.G.) Lange & C.Jens. | M | **-** | **-** | **-** | **-** | **●** | **-** | **-** |
| *Isopterygiopsis pulchella* (Hedw.) Iwats. | M | **-** | **-** | **-** | **-** | **●** | **-** | **-** |
| *Schizymenium pusillum* (Hook.f. & Wils.) Shaw | M | **-** | **-** | **-** | **-** | **●** | **-** | **-** |
| *Bryum nivale* Muell. Hal. | M | **-** | **-** | **-** | **-** | **●** | **-** | **-** |
| *Encalypta rhaptocarpa* Schwawgr. | M | **-** | **-** | **-** | **-** | **●** | **-** | **-** |
| *Syntrichia canivernis* var. *gypsophila* Mitt. | M | **-** | **-** | **-** | **-** | **-** | **●** | **-** |
| *Plagiothecium orthocarpum* Mitt. | M | **-** | **-** | **-** | **-** | **-** | **-** | **●** |
| *Ceratodon purpureus f. lingulatus* (Hedw.) Brid. | M | **-** | **-** | **-** | **-** | **-** | **-** | **●** |
| *Grimmia anodon* B.S.G. | M | **-** | **-** | **-** | **-** | **-** | **-** | **●** |
| *Plagiothecium cavifolium* (Bridel) Iwatsuki | M | **-** | **-** | **-** | **-** | **-** | **-** | **●** |
| *Pohlia wilsonii* (Mitt.) Broth. | M | **-** | **-** | **-** | **-** | **-** | **-** | **●** |
| *Schistidium serrato-mucronatum* (Muell.) Ochyra | M | **-** | **-** | **-** | **-** | **-** | **-** | **●** |

**TABLE S2.5:** Differential taxa among provinces of the Antarctic Kingdom (one presence). (●): presence, L: lichen. FK= Falklandian-South Georgian Province; K= Kerguelenian Province; M= Macquarian Province, AC= Aucklandian-Campbellian province; MA= Maritime Antarctica Province; WA= West Antarctica province; EA= East Antarctica Province

| **BIOGEOGRAPHIC REGIONS** | | **SUBANTARCTIC I.** | | | | **ANTARCTICA** | | |
| --- | --- | --- | --- | --- | --- | --- | --- | --- |
| **Taxon** | **class** | **FK** | **K** | **M** | **AC** | **MA** | **WA** | **EA** |
| *Bunodophoron melanocarpus* (Sw.) Wedin | L | **●** |  |  |  |  |  |  |
| *Cladina pycnoclada* (Pers.) Leighton | L | **●** |  |  |  |  |  |  |
| *Cladonia flammea* Ovst. | L | **●** |  |  |  |  |  |  |
| *Cladonia subsubulata* Nyl. | L | **●** |  |  |  |  |  |  |
| *Usnea igniaria* Mot. | L | **●** |  |  |  |  |  |  |
| *Cladonia subdigitata* Vain. | L |  |  | **●** |  |  |  |  |
| *Acarospora macrocyclos* Vain. | L |  |  |  |  | **●** |  |  |
| *Psoroma hypnorum* (Vahl) Gray | L |  |  |  |  | **●** |  |  |
| *Physconia muscigena* (Ach.) Poelt | L |  |  |  |  | **●** |  |  |
| *Cladonia chlorophaea* (Florke ex Somm.) Sprengel | L |  |  |  |  | **●** |  |  |
| *Cladonia pleurota* (Florke) Schaer. | L |  |  |  |  | **●** |  |  |
| *Catillaria corymbosa* (Hue) M.Lamb | L |  |  |  |  | **●** |  |  |
| *Cladonia galindezii* Ovst. | L |  |  |  |  | **●** |  |  |
| *Lecidea atrobrunnea* (Ram.) Schaer. | L |  |  |  |  | **●** |  |  |
| *Huea cerussata* (Hue) Dodge & Baker) | L |  |  |  |  | **●** |  |  |
| *Cladonia gracilis* (L.) Willd. | L |  |  |  |  | **●** |  |  |
| *Caloplaca cirrochrooides* (Vain.) Zahlbr. | L |  |  |  |  | **●** |  |  |
| *Cetraria aculeate* (Schreb.) Fr. | L |  |  |  |  | **●** |  |  |
| *Cladonia squamosa* (Scop.) Hoffm. | L |  |  |  |  | **●** |  |  |
| *Buellia russa* (Hue) Darb. | L |  |  |  |  | **●** |  |  |
| *Himantornia lugubris* (Hue) M.Lamb. | L |  |  |  |  | **●** |  |  |
| *Bacidia stipata* M Lamb. | L |  |  |  |  | **●** |  |  |
| *Lepraria straminea* Vain. | L |  |  |  |  | **●** |  |  |
| *Caloplaca isidioclada* Zahlbr. | L |  |  |  |  | **●** |  |  |
| *Coelopogon epiphorellus* (Nyl.) Brusse & Karnf. | L |  |  |  |  | **●** |  |  |
| *Peltigera rufescens* (Weis.) Humb. | L |  |  |  |  | **●** |  |  |
| *Verrucaria psychrophila* M.Lamb. | L |  |  |  |  | **●** |  |  |
| *Acarospora convoluta* Darb. | L |  |  |  |  | **●** |  |  |
| *Amandinea latemarginata* (Darb.) Socht. & Ovst. | L |  |  |  |  | **●** |  |  |
| *Cladonia carneola* (Fr.) Fr. | L |  |  |  |  | **●** |  |  |
| *Sphaerophorus globosus* (Huds.) Vain. | L |  |  |  |  | **●** |  |  |
| *Staurothele gelida* (Hook. f. & Tayl.) M.Lamb. | L |  |  |  |  | **●** |  |  |
| *Buellia perlata* (Hue) Darb. | L |  |  |  |  | **●** |  |  |
| *Buellia subpedicellata* (Hue) Darb. | L |  |  |  |  | **●** |  |  |
| *Huea coralligera* (Hue) Dodge & Baker | L |  |  |  |  | **●** |  |  |
| *Lecanora parmelinoides* Lumbsch | L |  |  |  |  | **●** |  |  |
| *Ramalina terebrata* Hook. & Tayl. | L |  |  |  |  | **●** |  |  |
| *Thamnolia vermicularis* (Sw.) Ach. | L |  |  |  |  | **●** |  |  |
| *Umbilicaria polyrrhiza* (L.) Fr. | L |  |  |  |  | **●** |  |  |
| *Usnea trachycarpa* (Stirt.) Mull.Arg. | L |  |  |  |  | **●** |  |  |
| *Rhizocarpon superficiale* (Schaer.) Vain. | L |  |  |  |  |  | **●** |  |
| *Beltraminia molholmi* Dodge | L |  |  |  |  |  | **●** |  |
| *Buellia racovitzae* Dodge | L |  |  |  |  |  | **●** |  |

| *Immersaria athrocarpa* (Ach.) Ramb. & Pitshch. | L |  |  |  |  |  | **●** |  |
| --- | --- | --- | --- | --- | --- | --- | --- | --- |
| *Parmelia rennellii* Dodge | L |  |  |  |  |  | **●** |  |
| *Rhizocarpon distinctum* Th.Fr. | L |  |  |  |  |  | **●** |  |
| *Rinodina endophragmia* Lamb. | L |  |  |  |  |  | **●** |  |
| *Umbilicaria krascheninnikovii* (Savicz) Zahlbr. | L |  |  |  |  |  | **●** |  |
| *Parmelia leucoblephara* Dodge & Baker | L |  |  |  |  |  |  | **●** |
| *Xanthoria mawsonii* Dodge | L |  |  |  |  |  |  | **●** |
| *Bacidia fibrosa* Lamb. | L |  |  |  |  |  |  | **●** |
| *Buellia illaetabilis* M.Lamb | L |  |  |  |  |  |  | **●** |
| *Buellia pernigra* Darb. | L |  |  |  |  |  |  | **●** |
| *Heppia antarctica* Dodge | L |  |  |  |  |  |  | **●** |
| *Lecanora mawsoni* Dodge | L |  |  |  |  |  |  | **●** |
| *Lecidea harrissoni* Dodge | L |  |  |  |  |  |  | **●** |
| *Toninia johnstoni* Dodge | L |  |  |  |  |  |  | **●** |
| *Xanthomendoza borealis* (R. Sant. & Poelt) Socht. | L |  |  |  |  |  |  | **●** |
| *Beltraminia rudolphi* (Dodge) Dodge | L |  |  |  |  |  |  | **●** |
| *Candelariella flava* (Dodge & Baker) Cast. & Nimis | L |  |  |  |  |  |  | **●** |
| *Buellia alboradians* Dodge & Baker | L |  |  |  |  |  |  | **●** |
| *Buellia grimmiae* Filson | L |  |  |  |  |  |  | **●** |
| *Buellia lignoides* Filson | L |  |  |  |  |  |  | **●** |
| *Buellia subtegens* Murray | L |  |  |  |  |  |  | **●** |
| *Caloplaca nigrescens* Golubk. & Savicz | L |  |  |  |  |  |  | **●** |
| *Catillaria inconspicua* Dodge & Baker | L |  |  |  |  |  |  | **●** |
| *Lecanora orosthea* Ach. | L |  |  |  |  |  |  | **●** |
| *Lecidea autenboeri* Dodge | L |  |  |  |  |  |  | **●** |
| *Kuttlingeria rutilans* Dodge & Baker | L |  |  |  |  |  |  | **●** |
| *Lecidea mcleani* Dodge | L |  |  |  |  |  |  | **●** |
| *Mastodia mawsoni* Dodge | L |  |  |  |  |  |  | **●** |
| *Omphalodiscus bakeri* Dodge | L |  |  |  |  |  |  | **●** |
| *Protoblastenia alba* Dodge & Baker | L |  |  |  |  |  |  | **●** |
| *Rhizocarpon schofieldi* Dodge | L |  |  |  |  |  |  | **●** |
| *Rinodina fecunda* Dodge | L |  |  |  |  |  |  | **●** |
| *Rinodina floccosa* (Dodge & Baker) Dodge | L |  |  |  |  |  |  | **●** |
| *Thamnolecania mawsoni* Dodge | L |  |  |  |  |  |  | **●** |
| *Buellia austropapillata* Ovst. | L |  |  |  |  |  |  | **●** |
| *Acarospora nitrophila* H.Magn. | L |  |  |  |  |  |  | **●** |
| *Acarospora flavocordia* Castello & Nimis | L |  |  |  |  |  |  | **●** |
| *Acarospora tyleri* Dodge | L |  |  |  |  |  |  | **●** |
| *Bacidia johnstoni* Dodge | L |  |  |  |  |  |  | **●** |
| *Bacidia harrisoni* Dodge | L |  |  |  |  |  |  | **●** |
| *Bacidia laseroni* Dodge | L |  |  |  |  |  |  | **●** |
| *Beltraminia stipitata* Dodge | L |  |  |  |  |  |  | **●** |
| *Biatorella chrysea* (Dodge & Baker) Dodge | L |  |  |  |  |  |  | **●** |
| *Blastenia grisea* Dodge & Baker | L |  |  |  |  |  |  | **●** |
| *Blastenia sparsa* Murray | L |  |  |  |  |  |  | **●** |
| *Blastenia viridans* Murray | L |  |  |  |  |  |  | **●** |
| *Bryonora castanea* (Hepp.) Poelt | L |  |  |  |  |  |  | **●** |
| *Buellia mcleani* Dodge | L |  |  |  |  |  |  | **●** |

| *Buellia pinnicola* Dodge | L |  |  |  |  |  |  | **●** |
| --- | --- | --- | --- | --- | --- | --- | --- | --- |
| *Buellia podocarpa* Dodge | L |  |  |  |  |  |  | **●** |
| *Buellia russellii* Dodge & Baker | L |  |  |  |  |  |  | **●** |
| *Catillaria granulosa* Dodge & Baker | L |  |  |  |  |  |  | **●** |
| *Gasparrinia adarensis* Dodge | L |  |  |  |  |  |  | **●** |
| *Gasparrinia elegans* Stin & Cohn | L |  |  |  |  |  |  | **●** |
| *Huea smaragdula* Dodge | L |  |  |  |  |  |  | **●** |
| *Heppia stereocauloides* Dodge | L |  |  |  |  |  |  | **●** |
| *Huea smaragdula* Dodge | L |  |  |  |  |  |  | **●** |
| *Kuttlingeria rufa* Dodge & Baker | L |  |  |  |  |  |  | **●** |
| *Latzelia antarctica* Dodge | L |  |  |  |  |  |  | **●** |
| *Lecania llanoi* Dodge | L |  |  |  |  |  |  | **●** |
| *Lecania schofieldi* Dodge | L |  |  |  |  |  |  | **●** |
| *Lecania subfuscula* (Nyl.) S.Ekman | L |  |  |  |  |  |  | **●** |
| *Lecanora lilacinofusca* Dodge & Baker | L |  |  |  |  |  |  | **●** |
| *Lecanora physciella* var. *sorediata* (Darb.) Hertel | L |  |  |  |  |  |  | **●** |
| *Lecanora subolivacea* Dodge & Baker | L |  |  |  |  |  |  | **●** |
| *Lecidea acerviformis* Murray | L |  |  |  |  |  |  | **●** |
| *Lecidea cinericia* Hue | L |  |  |  |  |  |  | **●** |
| *Omphalodina johnstoni* (Dodge) Dodge | L |  |  |  |  |  |  | **●** |
| *Omphalodina mcleani* (Dodge) Dodge | L |  |  |  |  |  |  | **●** |
| *Pannoparmelia delicata* Dodge & Baker | L |  |  |  |  |  |  | **●** |
| *Placynthiella icmalea* (Ach.) Coppins & James | L |  |  |  |  |  |  | **●** |
| *Polycauliona murrayi* Dodge | L |  |  |  |  |  |  | **●** |
| *Protoblastenia citrinigricans* Dodge & Baker | L |  |  |  |  |  |  | **●** |
| *Thelidium parvuum* Dodge & Baker | L |  |  |  |  |  |  | **●** |

**TABLE S2.6:** Differential taxa among provinces of the Antarctic Kingdom (one presence). (●): presence, H: liveworth. FK= Falklandian-South Georgian Province; K= Kerguelenian Province; M= Macquarian Province, AC= Aucklandian-Campbellian province; MA= Maritime Antarctica Province; WA= West Antarctica province; EA= East Antarctica Province

| **BIOGEOGRAPHIC REGIONS** | | **SUBANTARCTIC I.** | | | | **ANTARCTICA** | | |
| --- | --- | --- | --- | --- | --- | --- | --- | --- |
| **Taxon** | **class** | **FK** | **K** | **M** | **AC** | **MA** | **WA** | **EA** |
| *Adelanthus lindenbergianus* (Lehm.) Mitt. | H | **●** |  |  |  |  |  |  |
| *Chislocyphus fulvellus* (Hook. f. & Taylor) Nees | H | **●** |  |  |  |  |  |  |
| *Chislocyphus sabuletorum* (Ho. f. & Tayl.) Eng. & Sch. | H | **●** |  |  |  |  |  |  |
| *Gackstroemia magellanica* (Lam.) Trev. | H | **●** |  |  |  |  |  |  |
| *Lepidozia fuegiensis* Steph. | H | **●** |  |  |  |  |  |  |
| *Lepidozia laevifolia* (Hook.f. & Tayl.) G.L. & N. | H | **●** |  |  |  |  |  |  |
| *Plagiochila ansata* (Hook. f. & Tayl.) Hook.f. & Tayl. | H | **●** |  |  |  |  |  |  |
| *Riccardia papillosa* (Mass. & Steph.) Haessel | H | **●** |  |  |  |  |  |  |
| *Andrewsianthus lancistipus* Grolle | H |  | **●** |  |  |  |  |  |
| *Chandonanthus squarrosus* (Hook.) Mitt. | H |  |  | **●** |  |  |  |  |
| *Lophozia excisa* (Dicks) Dum | H |  |  |  |  | **●** |  |  |
| *Marchantia berteroana* Lehm. & Lindb*.* | H |  |  |  |  | **●** |  |  |
| *Chryptochila grandiflora* (Lindb. & Gott.) Grolle*,* | H |  |  |  |  | **●** |  |  |
| *Herzogrobryum teres* (Carringt. & Pears) Grolle | H |  |  |  |  | **●** |  |  |
| *Pachyglossa dissitifolia* Herz. & Grolle | H |  |  |  |  | **●** |  |  |

**Table S2.7:** Differential taxa among provinces of the Antarctic Kingdom (one presence). (●): presence, FU: fungi; FK= Falklandian-South Georgian Province; K= Kerguelenian Province; M= Macquarian Province, AC= Aucklandian-Campbellian province; MA= Maritime Antarctica Province; WA= West Antarctica province; EA= East Antarctica Province

| **BIOGEOGRAPHIC REGIONS** | | **SUBANTARCTIC I.** | | | | **ANTARCTICA** | | |
| --- | --- | --- | --- | --- | --- | --- | --- | --- |
| **Taxon** | **class** | **FK** | **K** | **M** | **AC** | **MA** | **WA** | **EA** |
| *Potridiscus polymorphus* Döbbler & Triebel | FU | **●** |  |  |  |  |  |  |
| *Potriphila epiphylla* Döbbler | FU | **●** |  |  |  |  |  |  |
| *Potriphila navicularis* Döbbler | FU | **●** |  |  |  |  |  |  |
| *Omphalina antarctica* Singer | FU |  |  |  |  | **●** |  |  |
| *Leptoglossum retirugum var. antarcticum* (Fr.) Rick. | FU |  |  |  |  |  |  | **●** |
| *Mytilidion mytillinellum* (Fr.) Zogg | FU |  |  |  |  |  |  | **●** |
